# Supplementary material
Source: Springer Nature journal article supplement (https://www.springerprofessional.de/resource/supplementary/13688_2014_13_MOESM24_ESM.pdf/11893772)

# Puzzle 4/s2 cumulative progress

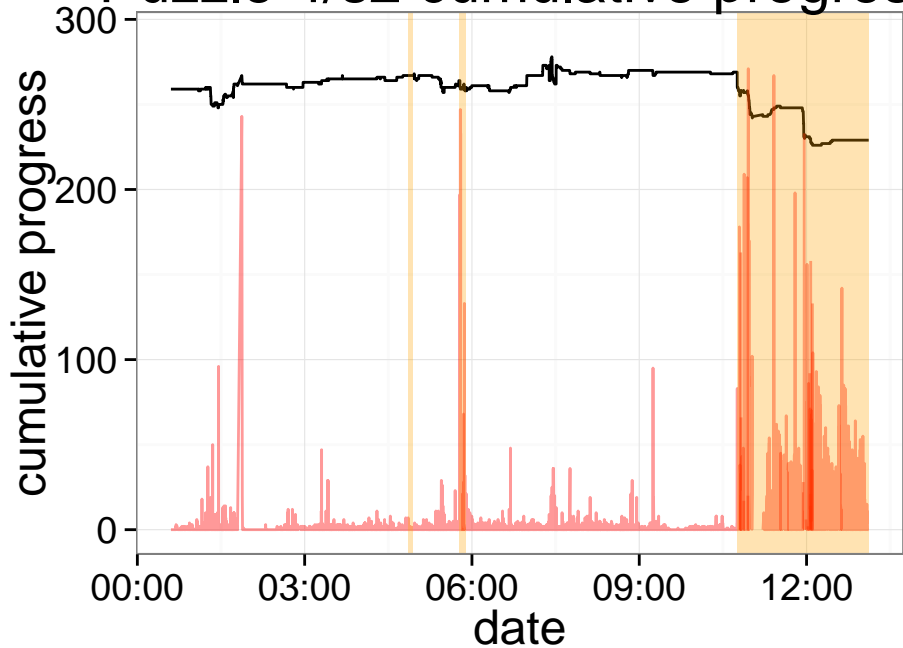

**type**

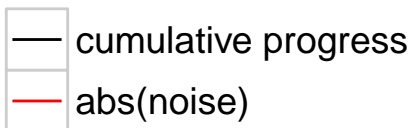

Supplement: MOESM24 [file 11893772]
